# Supplementary material for: Rice Stripe Virus Infection Facilitates the Reproductive Potential of Laodelphax striatellus
Source: MDPI journal article supplement (doi:10.3390/agronomy14040714), 2024-03-29
Supplement: s1 [file s1]

**Table S1.** Primers used in the present study

| Primer name                | Primer Sequence (5'-3')                   |
|----------------------------|-------------------------------------------|
| <b>For qRT-PCR</b>         |                                           |
| CP-RTF                     | CGCTGGCTGGTATGTCTGTC                      |
| CP-RTR                     | CCGCTGACTTCTGTTGCTGT                      |
| Vg-RTF                     | GTCCAGAACAGCAATCAGCA                      |
| Vg-RTR                     | GTTGACAAGGTTGCCCATCT                      |
| VgR-RTF                    | TCACGGAAATCAGCGTCTCTAT                    |
| VgR-RTR                    | AGGATGAACTAAGGCGTGCTC                     |
| $\beta$ -actin-RTF         | GCGAGAAATCGTCCGAGACAT                     |
| $\beta$ -actin-RTR         | AACTGGAGGAGGCGGCTGT                       |
| <b>For dsRNA synthesis</b> |                                           |
| T7-CP-F                    | TAATACGACTCACTATAGGGAGGAGTCCACAGCATCTT    |
| T7-CP-R                    | TAATACGACTCACTATAGGGCTGCAACTCTGATTGGCAT   |
| T7-GFP-F                   | TAATACGACTCACTATAGGGCACATGAAGCAGCACGACTT  |
| T7-GFP-R                   | TAATACGACTCACTATAGGGTGCTCAGGTAGTGGTTGTCTG |
